# Supplementary material for: Thrombus Density in Acute Basilar Artery Occlusion Depends on Slice Thickness and the Method of Manual Thrombus Delineation
Source: MDPI journal article supplement (doi:10.3390/life12081273), 2022-08-19
Supplement: s1 [file s1]

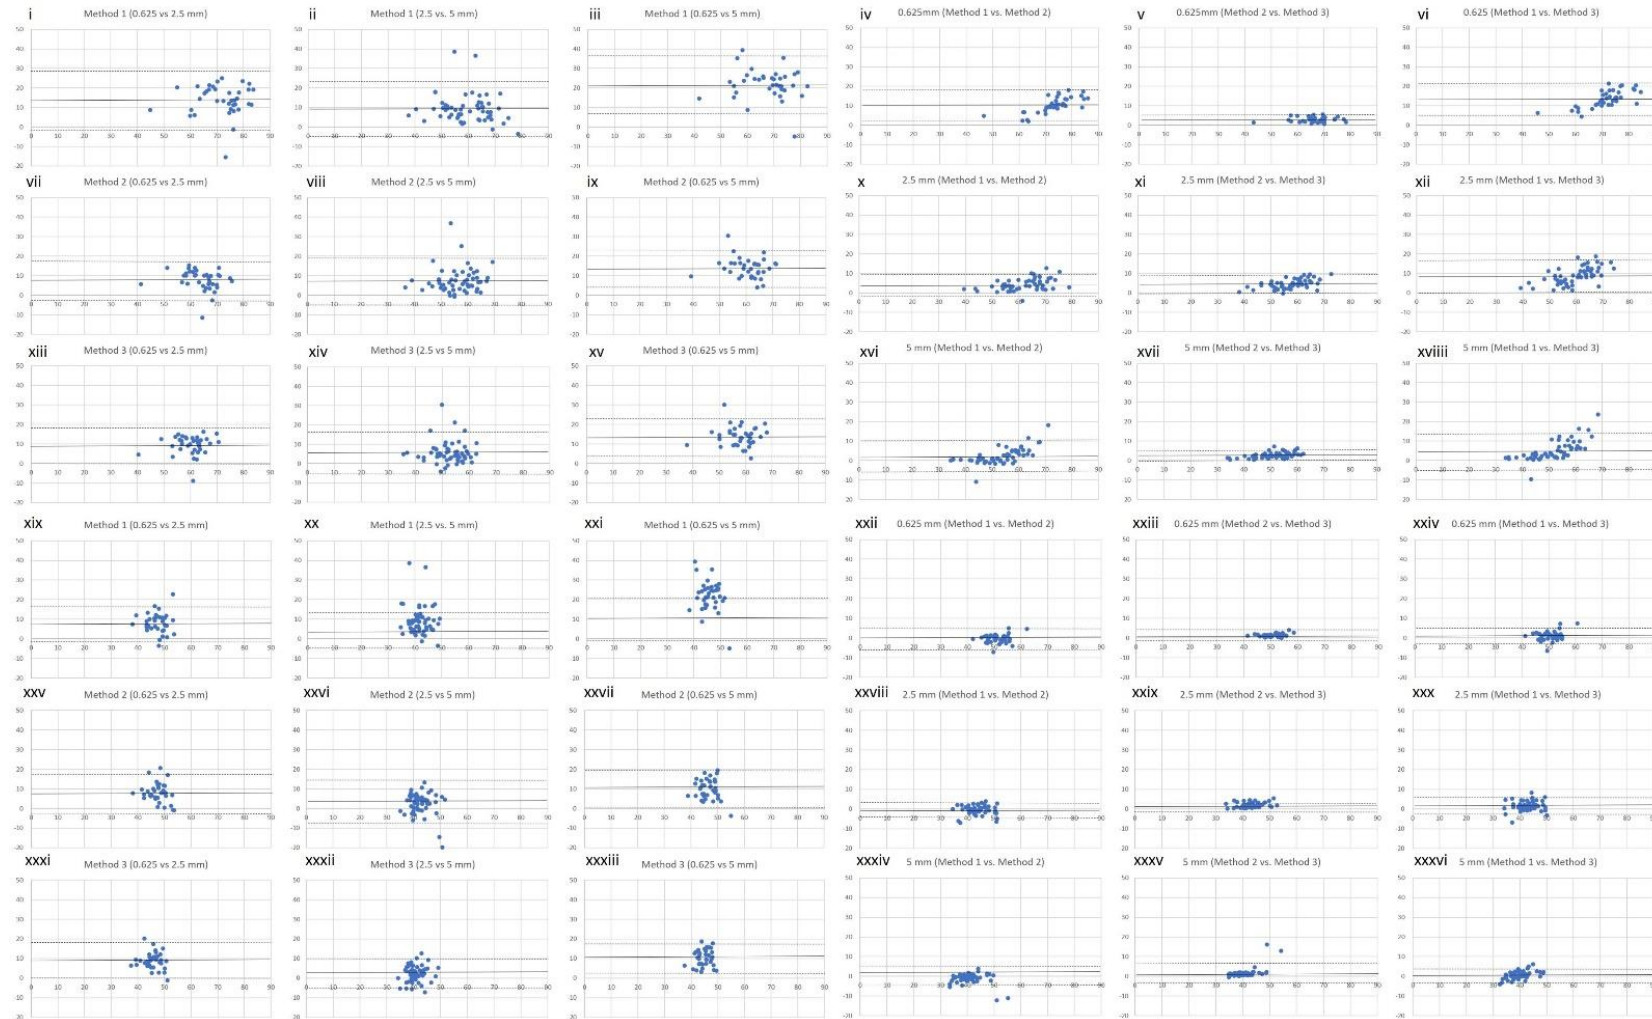

**Supplemental Figure S1.** Bland-Altman plots visualize the varying differences between the different methods of manual thrombus delineation and utilized slice thickness. (Normal vessel i–xviii, thrombus xix–xvi, solid line: mean difference, dotted lines: upper and lower limits of agreement).

**Supplemental Table S1.** Summary of the key references cited in the manuscript in chronological order.

| Study                   | n   | Treatment      | Site of Occlusion | Slice Thickness | Method | Absolute Density (HU)  | Relative Density (rHU)                  | Correlation with<br>Recanalization | Outcome |
|-------------------------|-----|----------------|-------------------|-----------------|--------|------------------------|-----------------------------------------|------------------------------------|---------|
| Puig et al., 2012       | 87  | IVT            | AC                | 3 mm            | Whole  | 42 vs. 50              | 1.52 vs. 1.15                           | Yes                                | NA      |
| Froehler et al. 2013    | 67  | EVT            | AC/BA (n=4)       | 4.8 mm          | 3 RoIs | NA                     | 1.46 <sup>a</sup> vs. 1.03 <sup>b</sup> | Yes                                | NA      |
| Moftakhar et al., 2013  | 90  | IVT            | AC and PC         | 2.5 mm          | 1 RoI  | 55±24.8 vs. 52±14.2    | 1.58 vs. 1.39                           | Yes                                | NA      |
|                         |     | EVT            |                   |                 |        | 55±24.5 vs. 45±19.1    | 1.66 vs. 1.40                           |                                    |         |
|                         |     | EVT+IVT        |                   |                 |        | 51±22.3 vs. 45±13      | 1.7 vs. 1.3                             |                                    |         |
| Yilmaz et al., 2013     | 70  | EVT            | AC                | 5 mm            | 1 RoI  | 50.1 vs. 48.7          | NA                                      | No                                 | NA      |
| Spiotta et al., 2014    | 141 | EVT            | NA                | 4.8 mm          | 3 RoIs | 57.1±16.3 vs 68.7±43.2 | NA                                      | No                                 | No      |
| Topcuoglu et al., 2014  | 105 | IVT<br>IA rtPA | AC                | 5 mm            | 1 RoI  | 47.4 vs. 49.4          | 1.13 vs. 1.17                           | NA                                 | No      |
| Mokin et al., 2015      | 41  | EVT            | AC                | 5 mm            | Whole  | 49.9±7.6 vs. 43.8±6.6  | 1.2±0.2 vs. 1.0±0.1                     | Yes                                | NA      |
| Angermaier et al., 2015 | 171 | EVT            | AC                | 4.5 mm          | NA     | NA                     | NA                                      | No                                 | NA      |
| Jagani et al., 2017     | 118 | EVT            | AC/BA (n=19)      | 5 mm            | 1 RoI  | 50.1±7.4 vs. 53±12.7   | 1.31±0.22 vs. 1.37±0.34                 | No                                 | NA      |
| Shu et al. 2017         | 51  | EVT            | BA                | 2.5 mm          | Whole  | 52.3±5.8 vs 48.4±6.7   | 1.29±0.14 vs 1.35±0.15                  | No                                 | Yes     |
| Ye et al., 2019         | 64  | EVT            | AC                | 1 mm            | 1 RoI  | 65.27 vs. 62.19        | NA                                      | No                                 | NA      |
| Bruggeman et al., 2022  | 566 | EVT            | AC                | <2.5 mm         | 3 RoIs | NA                     | NA                                      | No                                 | No      |

(IVT: i.v. thrombolysis, EVT: endovascular therapy, AC: anterior circulation, PC: posterior circulation, BA: basilar artery, NA: not applicable). a: hyperdense, b: isodense.
